# Supplementary material for: Delivery and Biosafety of Oncolytic Virotherapy
Source: PubMed Central journal article supplement (PMC7176816; doi:10.3389/fonc.2020.00475), 2020-04-16
Supplement: Table_1.pdf [file Table_1.pdf]

**Supplementary Table 1. Delivery routes and the biosafety of oncolytic virus**

|                                | <b>Virus type</b>          | <b>Oncolytic virus</b> | <b>Indication</b>                                                   | <b>Reference</b> |
|--------------------------------|----------------------------|------------------------|---------------------------------------------------------------------|------------------|
| <b>Delivery routes</b>         |                            |                        |                                                                     |                  |
| Intratumoral administration    | HSV                        | HSV1716                | Extracranial cancers                                                | (44)             |
|                                | Adenovirus                 | VCN-01                 | Retinoblastoma                                                      | (46)             |
|                                | Vesicular stomatitis virus | VSV $\Delta$ 51        | Melanoma                                                            | (39)             |
|                                | Alphavirus                 | M1                     | Glioblastoma                                                        | (40)             |
|                                | HSV                        | HF10                   | Pancreatic carcinoma                                                | (50)             |
|                                | Reovirus                   | Reovirus               | Astrocytoma                                                         | (51)             |
|                                | Reovirus                   | Reovirus               | Gliomas                                                             | (48)             |
|                                | Poxvirus                   | CF33-hNIS              | Colon cancer                                                        | (45)             |
|                                | Poxvirus                   | CF33                   | Triple-negative breast cancer                                       | (47)             |
|                                | Poxvirus                   | CF33-Fluc              | Colorectal cancer                                                   | (69)             |
| Intravenous administration     | Reovirus                   | Reovirus               | Astrocytoma                                                         | (53)             |
|                                | Vaccinia virus             | OVV-CXCR4-A-Fc         | Neuroblastoma                                                       | (54)             |
|                                | HSV                        | G207                   | Supratentorial malignant tumors                                     | (56)             |
|                                | Poxvirus                   | Poxvirus               | Neuroblastoma                                                       | (55)             |
|                                | Adenovirus                 | Ad-IAI.3B              | Lung squamous cell carcinoma                                        | (57)             |
|                                | Alphavirus                 | M1                     | Bladder cancer                                                      | (58)             |
|                                | Reovirus                   | Reovirus               | Carcinoma ovarii, Carcinoma of fallopian tube, Peritoneal carcinoma | (60)             |
|                                | Maraba virus               | MG1                    | Prostatic carcinoma                                                 | (59)             |
|                                | Adenovirus                 | Ad6                    | Prostate cancer                                                     | (61)             |
|                                | HSV                        | T-VEC                  | Melanoma                                                            | (63)             |
| Intraperitoneal administration | Measles virus              | MV-GFP                 | Atypical teratogenic rhabdoid tumor                                 | (64)             |
|                                | HSV                        | oHSV-1                 | Kaposi's sarcoma, angiosarcoma, epithelioid sarcoma                 | (65)             |
|                                | Adenovirus                 | ONCOS-102              | Gastrointestinal stromal tumor, leiomyosarcoma, liposarcoma         | (67)             |
| Intrathecal treatment          | Poxvirus                   | CF33                   | Pancreatic carcinoma                                                | (66)             |
|                                | Poliovirus                 | PVS-RIPO               | Glioblastoma, Glioma, Ependymoma, Primitive neuroectodermal tumor,  | (68)             |

|                                       |               |             |                                                                                                   |                   |
|---------------------------------------|---------------|-------------|---------------------------------------------------------------------------------------------------|-------------------|
|                                       |               |             | Central nervous system<br>lymphoma                                                                |                   |
| Subcutaneous administration           | Adenovirus    | ONCOS-102   | Melanoma, soft tissue sarcoma                                                                     | (67)              |
| <b>Biosafety</b>                      |               |             |                                                                                                   |                   |
| Common adverse events (only)          |               |             |                                                                                                   |                   |
| Severe adverse events (only)          | Parvovirus    | H-1PV       | Multiforme glioblastoma                                                                           | (113, 114)        |
| Both Common and Severe adverse events | HSV           | T-VEC       | Melanoma                                                                                          | (77)              |
|                                       | HSV           | HSV1716     | High grade glioma, malignant pleural mesothelioma                                                 | (104)             |
|                                       | HSV           | G207        | Cerebellar tumor, supratentorial brain tumor                                                      | (105, 106)        |
|                                       | HSV           | HF10        | Melanoma, squamous cell carcinoma of the skin, pancreatic cancer                                  | (107, 108)        |
|                                       | Adenovirus    | VCN-01      | Solid tumor, pancreatic cancer                                                                    | (74)              |
|                                       | Adenovirus    | CG0070      | Bladder Cancer                                                                                    | (75)              |
|                                       | Adenovirus    | Ad5-Δ24-RGD | Breast cancer, glioblastoma                                                                       | (91)              |
|                                       | Adenovirus    | H101        |                                                                                                   | (82, 83, 86, 109) |
|                                       | Adenovirus    | Onyx-015    |                                                                                                   | (85)              |
|                                       | Adenovirus    | CGTG-102    | Solid tumor                                                                                       | (84, 101)         |
|                                       | Adenovirus    | ICOVIR-5    | Melanoma                                                                                          | (92)              |
|                                       | Pox virus     | JX-594      | Colorectal cancer, hepatocellular carcinoma, melanoma                                             | (93, 94)          |
|                                       | Pox virus     | GL-ONC1     | Ovarian cancer, head and neck cancer, solid tumor                                                 | (96)              |
|                                       | Reovirus      | Reolysin    | Melanoma, multiple myeloma, solid tumor in children, ovarian epithelial cancer, peritoneal cancer | (60)              |
|                                       | Measles virus | MV-CEA      | Ovarian epithelial cancer, primary peritoneal cancer, fallopian tube cancer                       | (78)              |
|                                       | Measles virus | MV-NIS      | Multiple myeloma, non-small cell lung cancer, urothelial carcinoma, malignant pleural             | (112)             |

|                                                                   |                            | mesothelioma |                                         |
|-------------------------------------------------------------------|----------------------------|--------------|-----------------------------------------|
| Neither Common<br>or Severe adverse<br>events (No reports<br>yet) | HSV                        | OH2          | Intestinal cancer                       |
|                                                                   | Adenovirus                 | LOAd703      | Pancreatic cancer                       |
|                                                                   | Pox virus                  | vvDD         |                                         |
|                                                                   | Coxsackie virus            | Cavatak      | Head and neck cancer,<br>melanoma       |
|                                                                   | Newcastle<br>disease virus | NVD          | Glioblastoma, sarcoma,<br>neuroblastoma |

Note:

**Common adverse** events include flulike symptoms (fever, fatigue, nausea, vomiting), local injection reaction (inflammation, erythema and rash at the injection site), headache, back pain, anemia, leukopenia, neutropenia, liver dysfunction, weight loss, elevated liver enzymes, thrombocytopenia, bladder spasm, hematuria, dysuria, urgency, abdominal pain, glucose abnormalities, hair loss, mild electrolyte disturbances, hypotension, tachycardia, hypertension, anorexia, myalgia, diarrhea.

**Severe adverse** events include severe hypotension, tachycardia, cellulitis, dyspnea, pleural effusion, urinary tract infection, hydrocephalus, seizures, varicella zoster infection, brain edema, speech disorder, encephalitis, hepatitis, viral infection, perforated peritonitis, severe liver dysfunction, viremia, severe dysuria, dehydration, intestinal obstruction, hypokalemia, severe leukopenia, sepsis, pulmonary embolism, edema, pustules, severe lymphopenia, severe fever, severe headache, pancreatitis, severe neutropenia, severe diarrhea, arthralgia, biliary duct proliferation, decreased consciousness.

**The references** of the right column are listed in the main text of this publication.
